# Supplementary material for: Vapor-Deposited Reactive Coating with Chemically and Topographically Erasable Properties
Source: MDPI journal article supplement (doi:10.3390/polym11101595), 2019-09-29
Supplement: s1 [file s1]

## Supplementary Materials

### **Vapour-Deposited Reactive Coating with Chemically and Topographically Erasable Properties**

Yu-Chih Chiang <sup>3,†</sup>, Cuei-Ping Ho <sup>1,†</sup>, Yin-Lin Wang <sup>3</sup>, Po-Chun Chen <sup>4</sup>, Peng-Yuan Wang <sup>5,6,\*</sup> and Hsien-Yeh Chen <sup>1,2,\*</sup>

<sup>1</sup> Department of Chemical Engineering, National Taiwan University, Taipei 10617, Taiwan

<sup>2</sup> Advanced Research Center for Green Materials Science and Technology, National Taiwan University, Taipei 10617, Taiwan

<sup>3</sup> School of Dentistry, Graduate Institute of Clinical Dentistry, National Taiwan University and National Taiwan University Hospital, Taipei, 10048, Taiwan

<sup>4</sup> Institute of Materials Science and Engineering, National Taipei University of Technology, Taipei 10608, Taiwan

<sup>5</sup> Center for Human Tissues and Organs Degeneration, Institute of Biomedicine and Biotechnology, Shenzhen Institutes of Advanced Technology, Chinese Academy of Sciences, Shenzhen 518055, China

<sup>6</sup> Department of Chemistry and Biotechnology, Swinburne University of Technology, Victoria 3122, Australia

\* Correspondence: cpc@mail.ntut.edu.tw (P-C. C); py.wang@siat.ac.cn (P-Y. W); hsyachen@ntu.edu.tw (H-Y. C) Tel. +886-2-33669476; Fax. +886-2-23623040

† Y.-C. Chiang and C.-P. Ho contributed equally to this work.

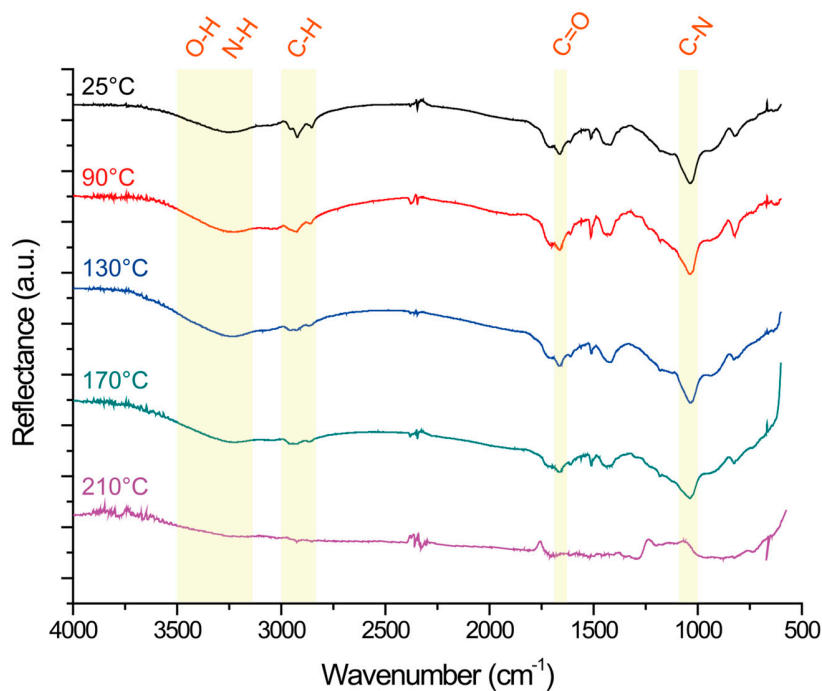

**Figure S1.** FT-IR spectra showing the thermal stability of the erasable coating at 25 °C, 90 °C, 130 °C, 170 °C and 210 °C. The film remained thermally stable from 25 °C to 170 °C based on negligible changes in the position and intensity of the characteristic bands of  $C=O$ ,  $C-N$ ,  $N-H$ , and  $O-H$ . However, the decreased intensities for the  $C=O$ ,  $C-N$ ,  $N-H$ , and  $O-H$  peaks suggested a limitation of the thermal stability at 210 °C.

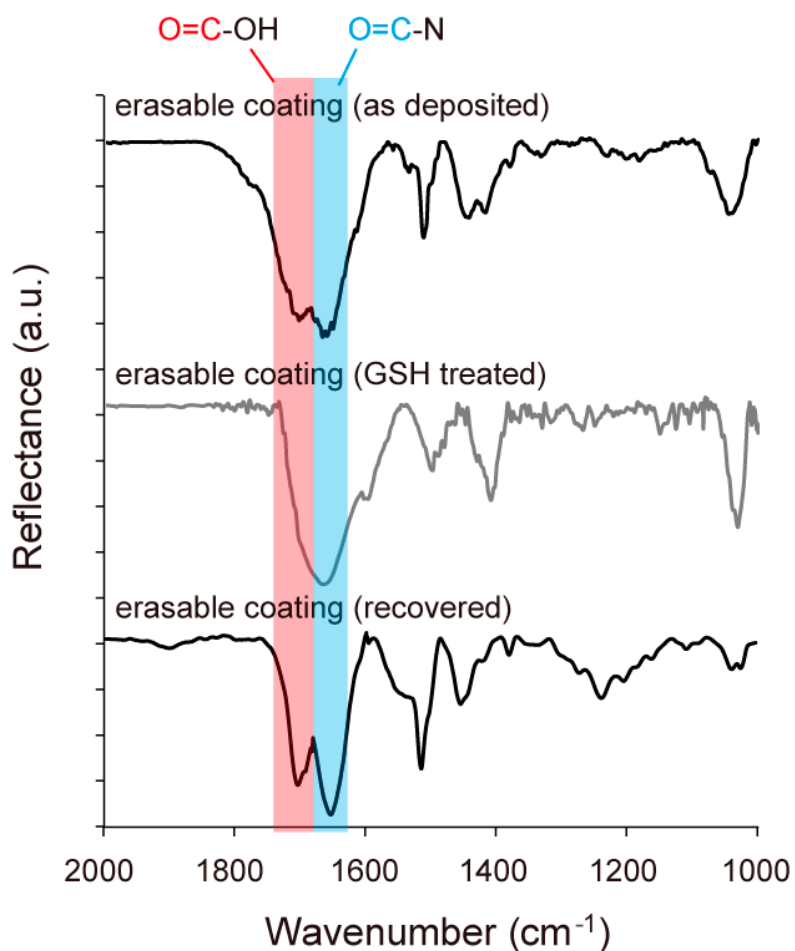

**Figure S2.** Reaction efficiency analysis of the erasable coating. FT-IR spectra were recorded for the coating before (as deposited) and after modifications including GSH treatment and recovering the coating with 3-mercaptopropionic acid. A selected range of scans from 1000 to 2000 cm<sup>-1</sup> was used during the FT-IR acquisition. Experiments were performed on the same sample surface, and a high efficiency of  $88.5 \pm 3.7\%$  was discovered based on comparing the integrated peak areas of *O=C-OH* (with respect to unchanged areas for *O=C-N*).
